# Supplementary material for: CXC chemokine receptor 4 expressed in T cells plays an important role in the development of collagen-induced arthritis
Source: PubMed Central journal article supplement (PMC2991023; doi:10.1186/ar3158), 2010-10-12

A

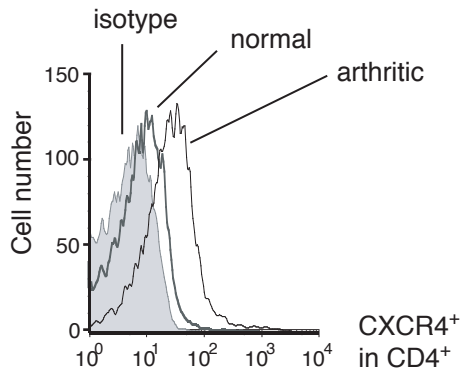

B

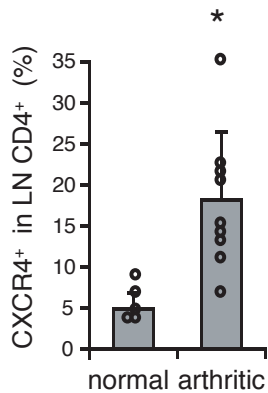

Supplement: ar3158-S6.pdf [file ar3158-S6.pdf]
